# Supplementary material for: Electrospun Polycrown Ether Composite Nanofibers as an Adsorbent for On-Line Solid Phase Extraction of Eight Bisphenols from Drinking Water Samples with Column-Switching Prior to High Performance Liquid Chromatography
Source: MDPI journal article supplement (doi:10.3390/polym14214765), 2022-11-07
Supplement: s1 [file s1]

# Electrospun Polycrown Ether Composite Nanofibers as an Adsorbent for On-Line Solid Phase Extraction of Eight Bisphenols from Drinking Water Samples with Column-Switching Prior to High Performance Liquid Chromatography

Tong Xu <sup>1</sup>, Rui Zhang <sup>1</sup>, Yueling Bi <sup>2</sup>, Jingjing Li <sup>1</sup>, Xiaohuan Li <sup>1</sup>, Liqin Chen <sup>1,3,\*</sup> and Zhongze Fang <sup>1,3,\*</sup>

<sup>1</sup> Department of Toxicology and Sanitary Chemistry, School of Public Health, Tianjin Medical University, Tianjin 300070, China

<sup>2</sup> Department of Pharmacy, Tianjin Xiqing Hospital, Tianjin 300380, China

<sup>3</sup> Tianjin Key Laboratory of Environment, Nutrition and Public Health, Tianjin 300070, China

\* Correspondence: chenliqin@tmu.edu.cn (L.C.); fangzhongze@tmu.edu.cn (Z.F.)

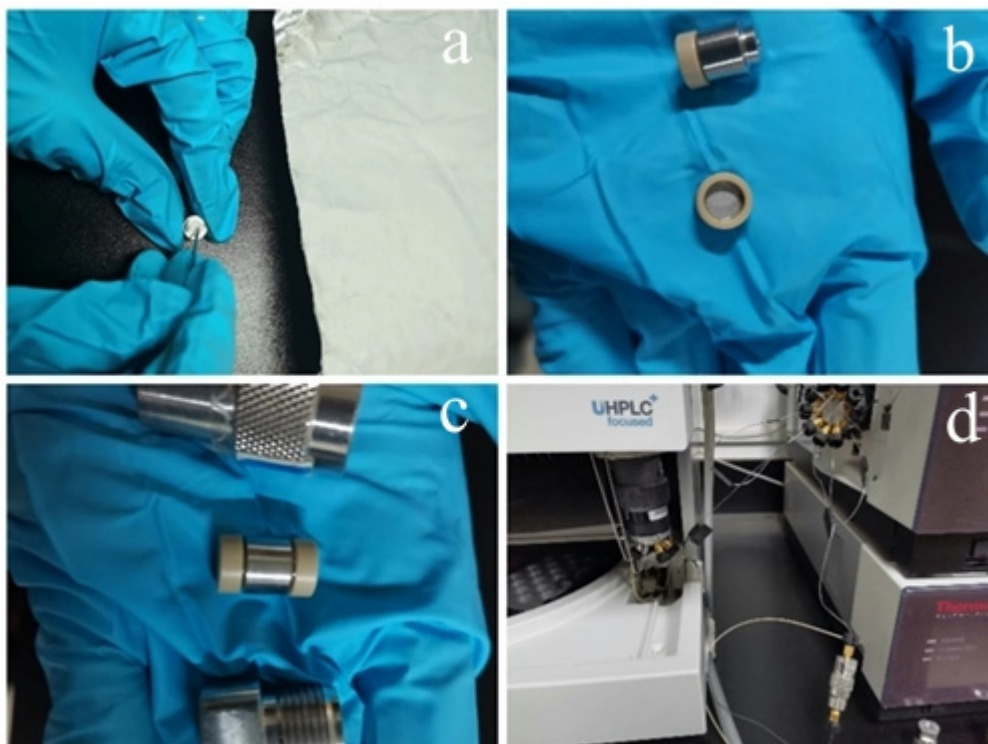

**Figure S1.** The preparation of the on-line PFSPE column and connection to the HPLC system.  
a: nanofiber packed into empty column cartridge; b: prepared PFSPE column; c: prepared PFSPE column with guard column holder; d: PFSPE column connected to HPLC system

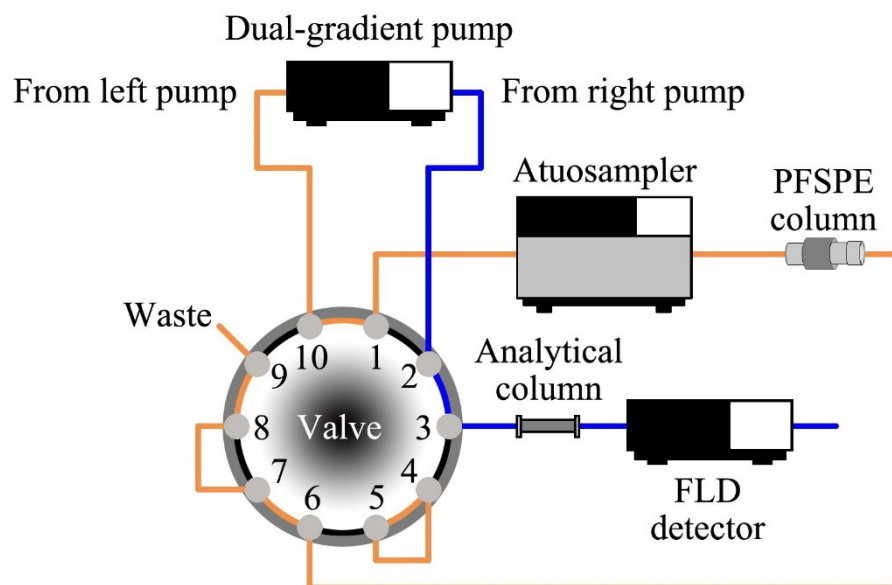

a. Valve position: 10-1

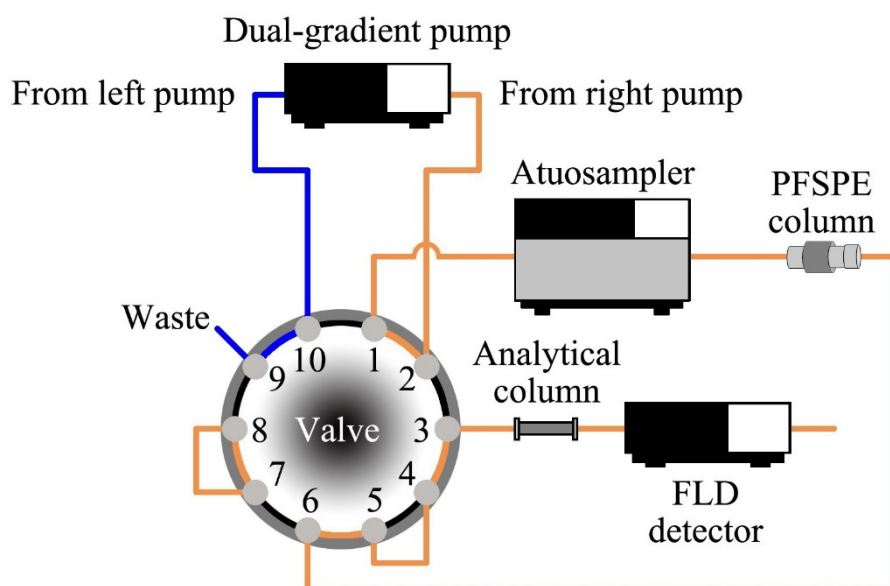

b. Valve position: 2-1

**Figure S2.** The schematic diagram of on-line sample pretreatment and transfer of the target compounds

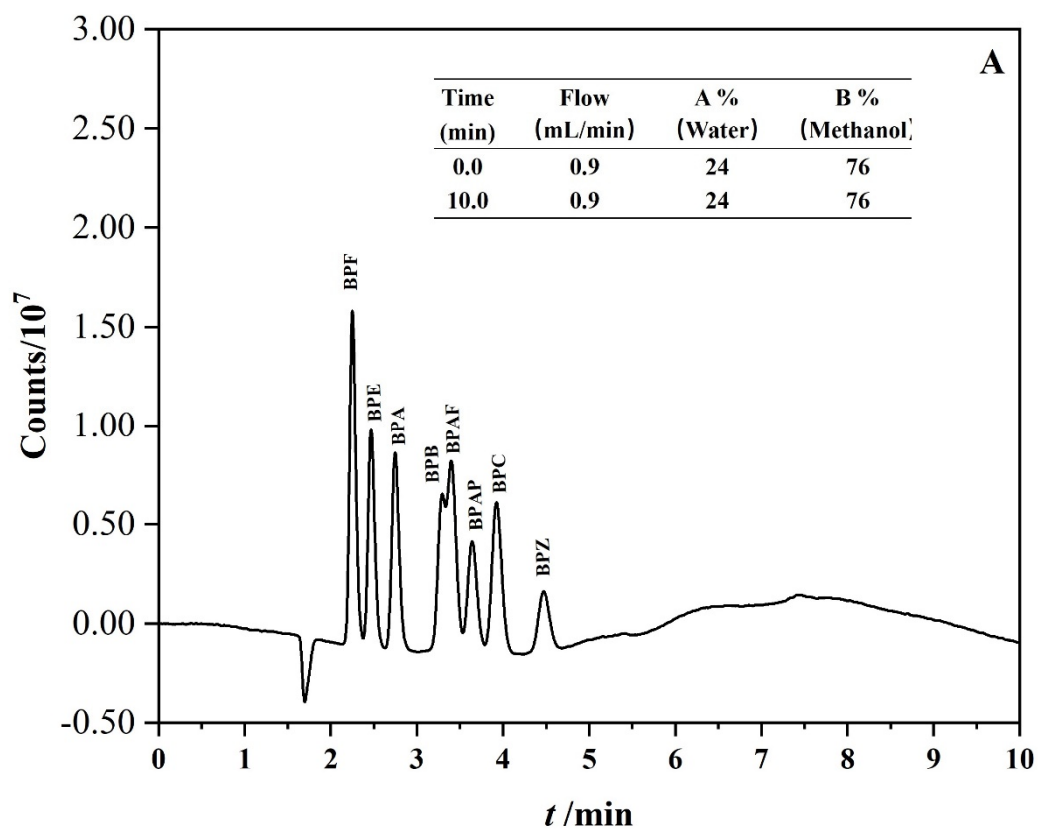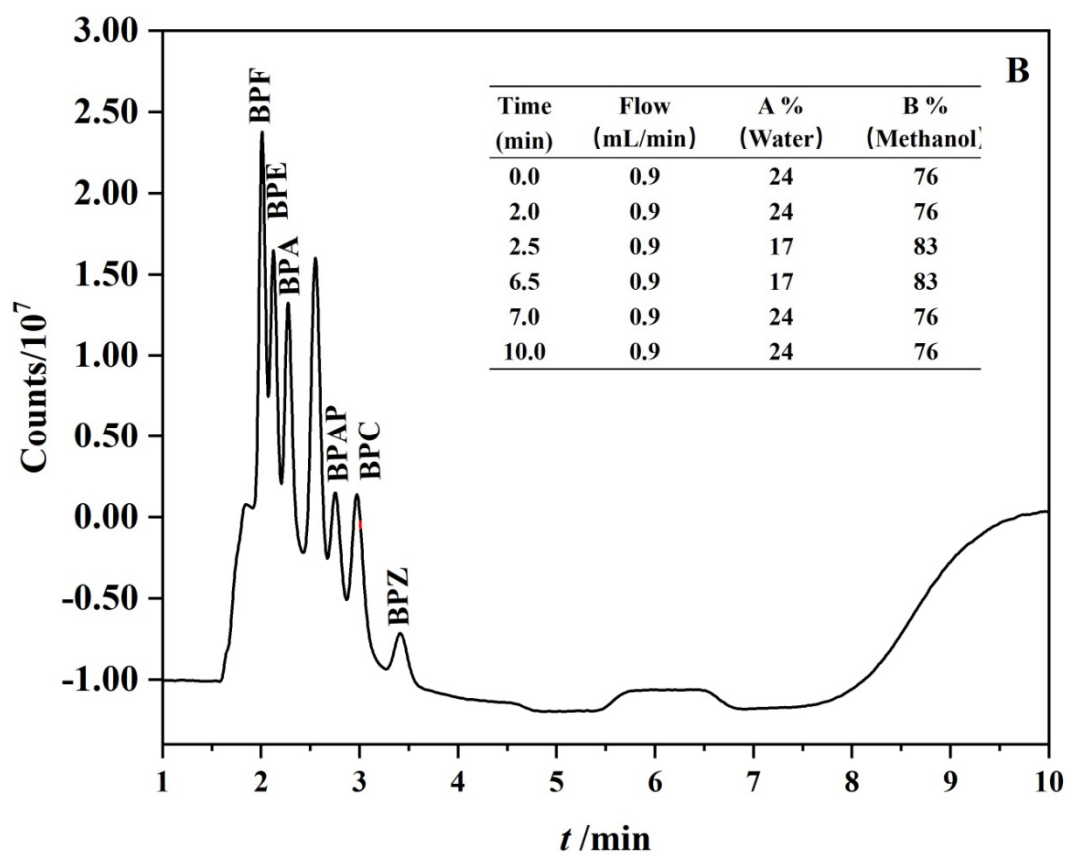

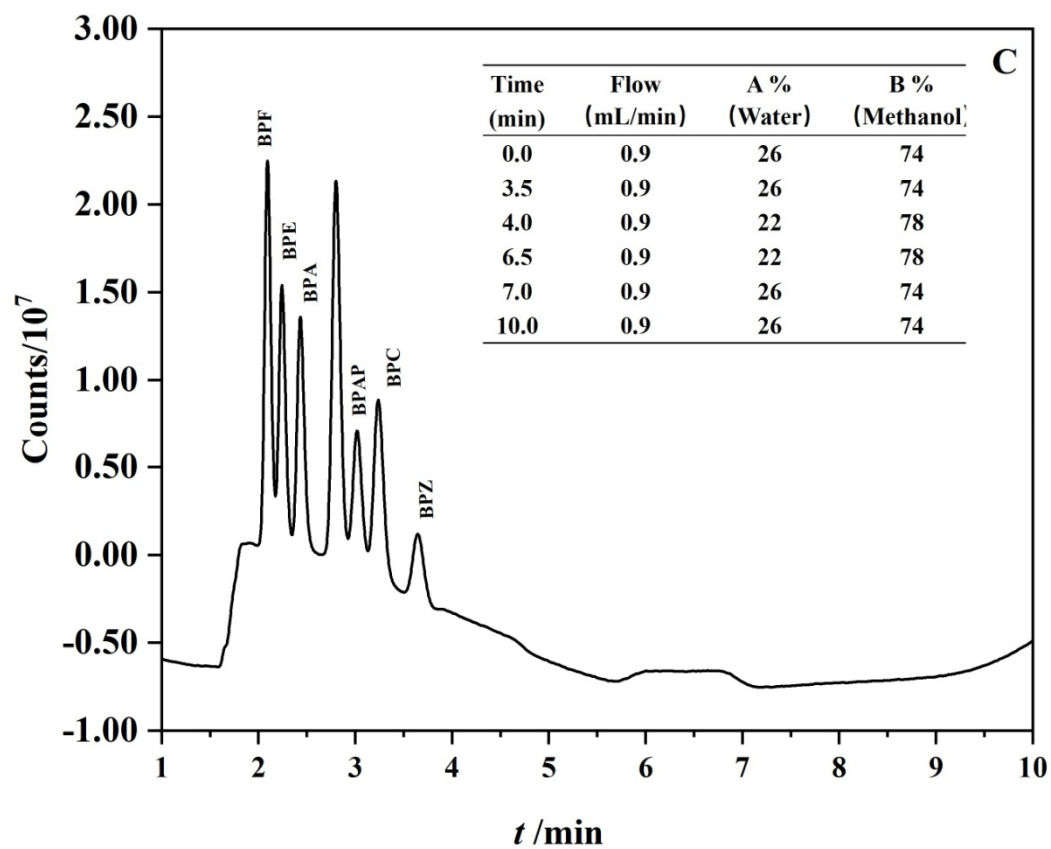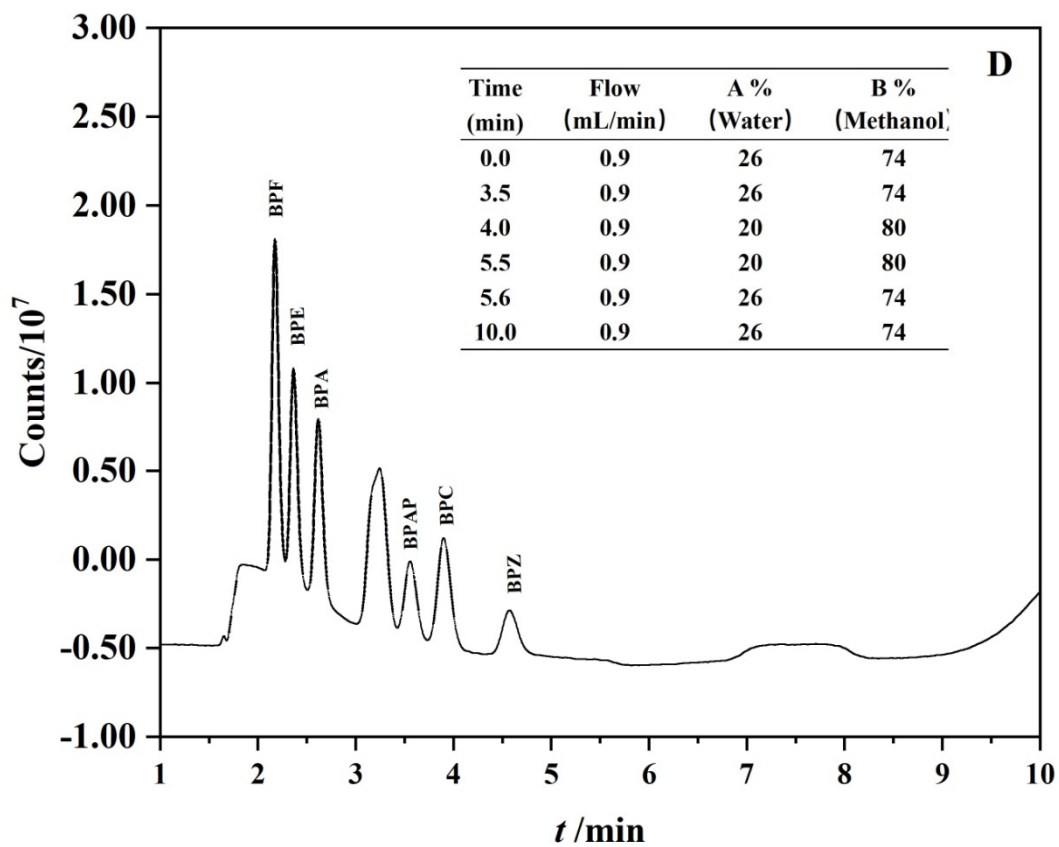

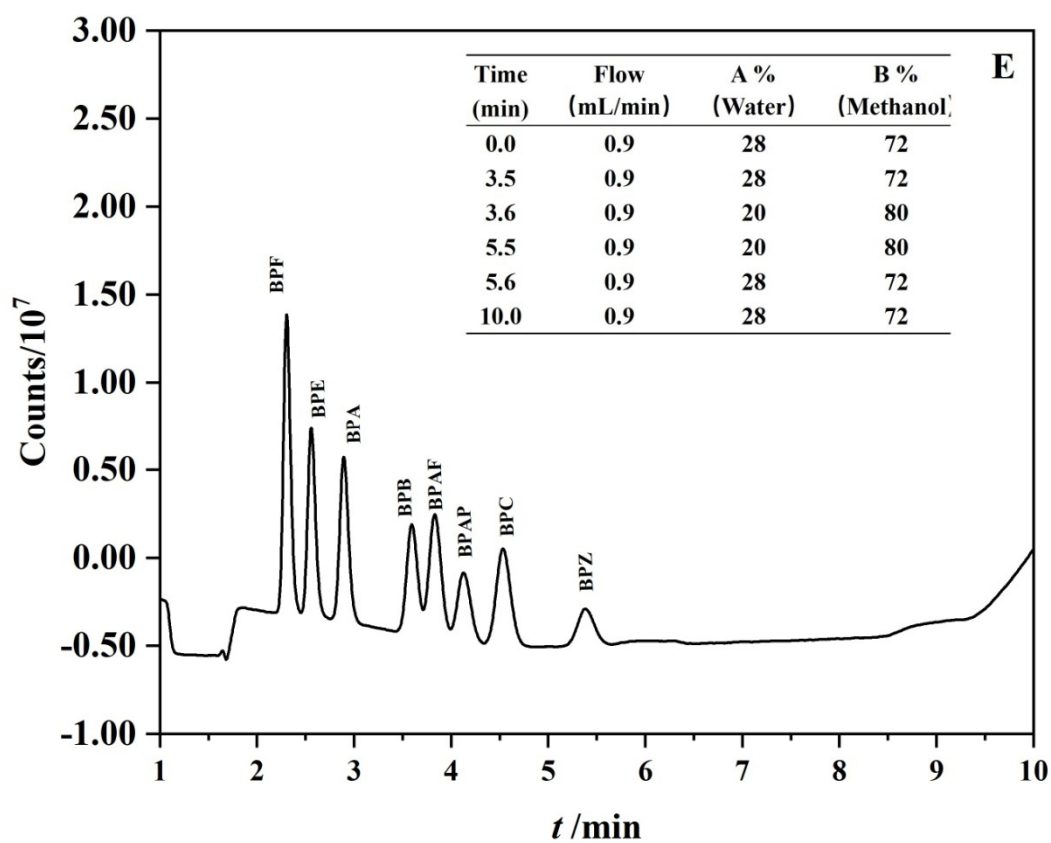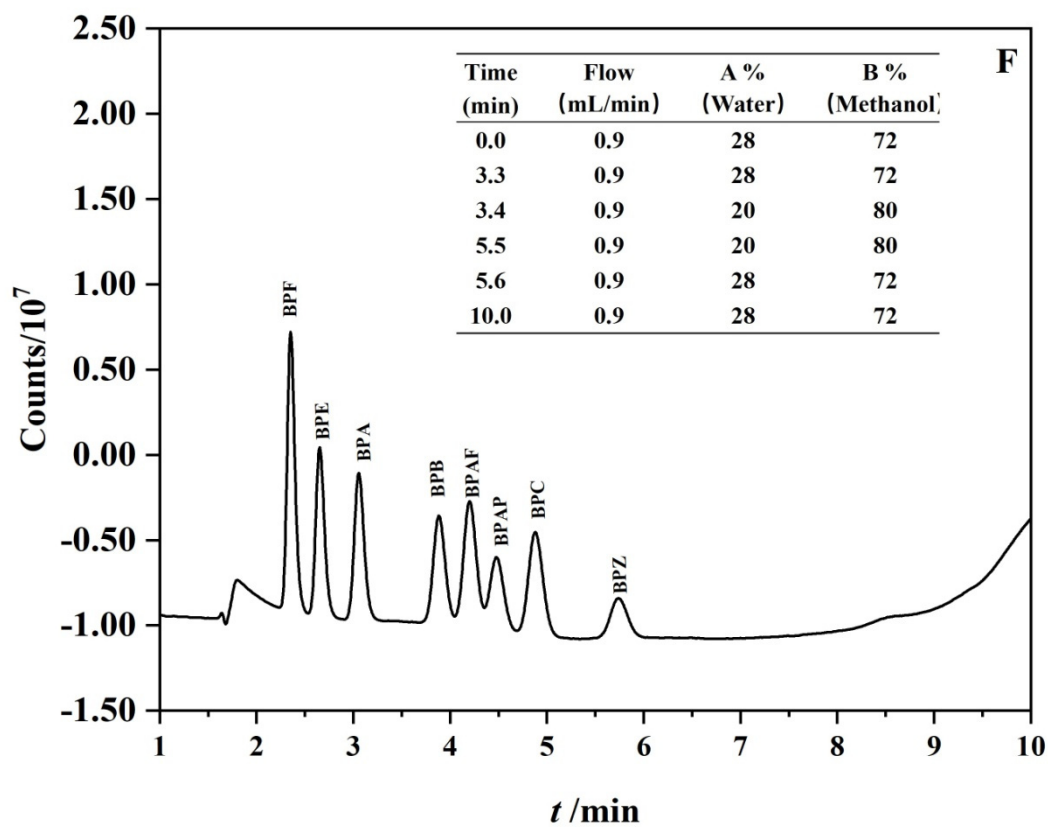

**Figure S3.** BPs separation under different gradient programs

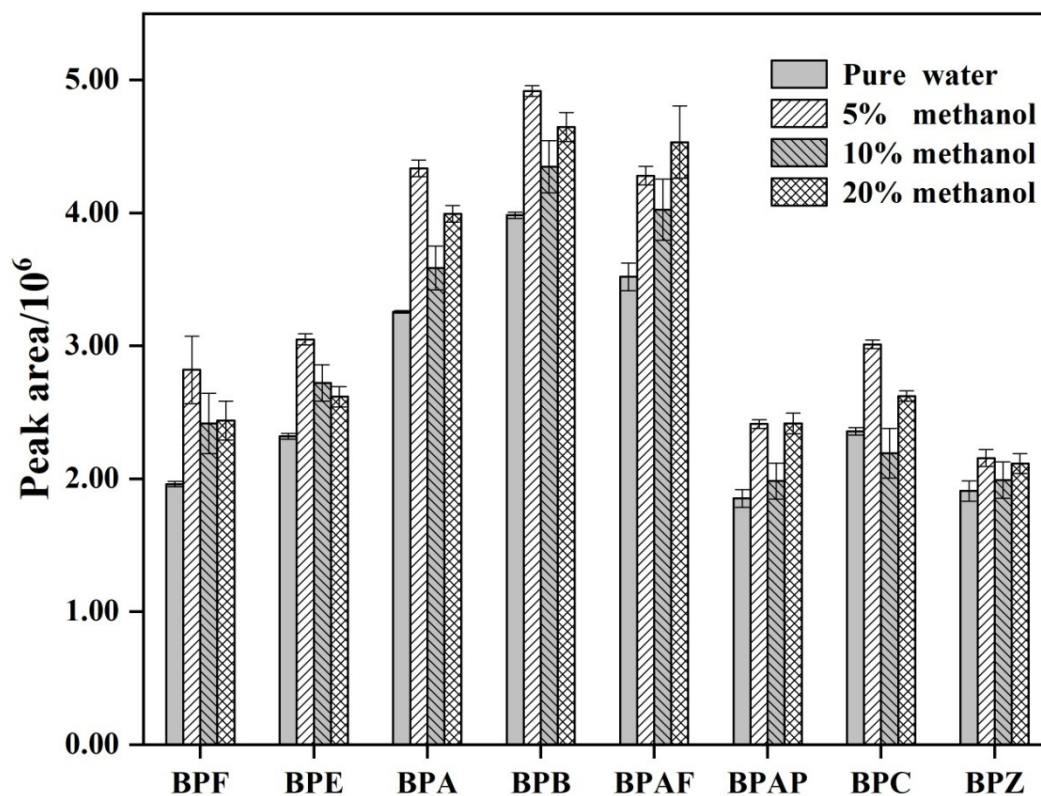

Figure S4. Comparison of peak area of the BPs at different carrier mobile phase

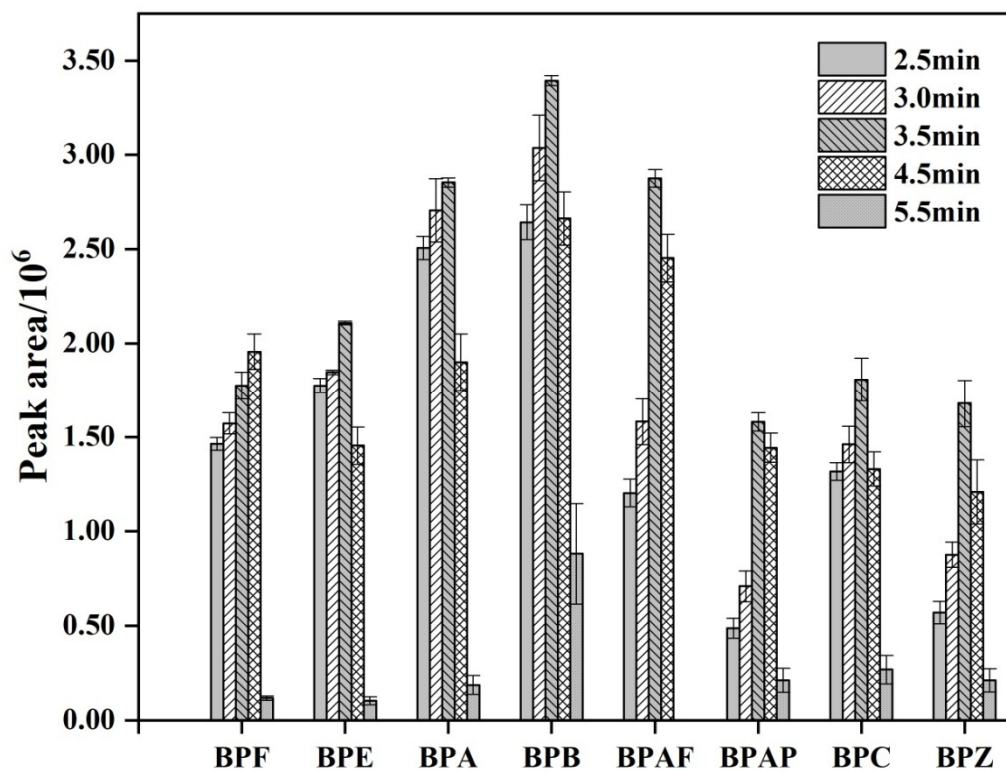

Figure S5. Comparison of peak area of the BPs at different durations

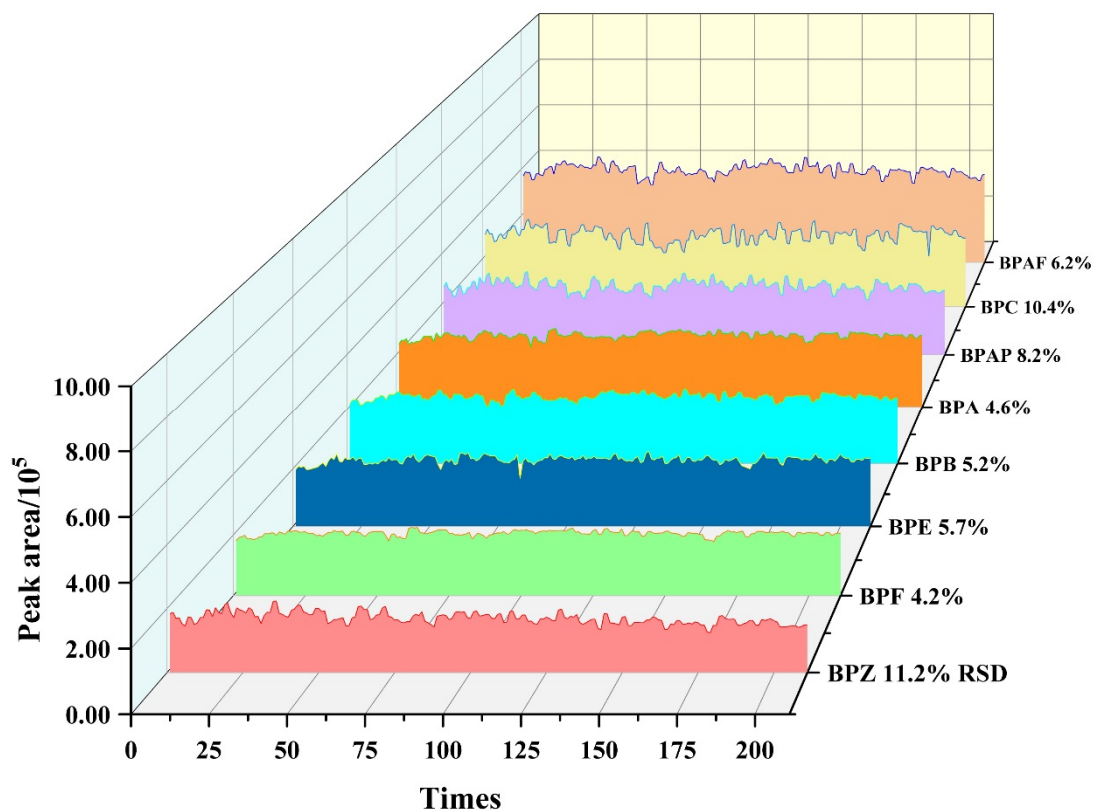

**Figure S6.** Change of peak area of BPs with the number of PFSPE columns used (10×2.1 mm PFSPE column, 5 ng/mL standard solution spiked in water)

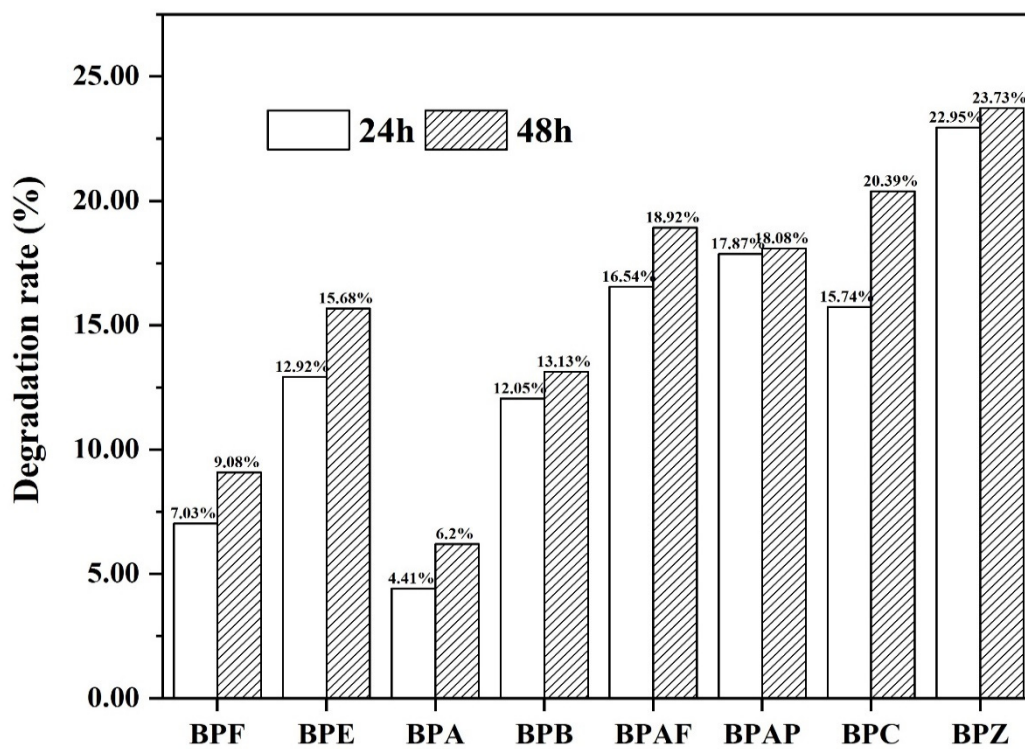

**Figure S7.** Degradation rate of 8 BPs at 24 h and 48 h (10×2.1 mm PFSPE column, 5 ng/mL standard solution spiked in water)

**Table S1.** The characteristics of drinking water samples

| Sample No. | Ca <sup>2+</sup><br>(mg/L) | Mg <sup>2+</sup><br>(mg/L) | Na <sup>+</sup><br>(mg/L) | K <sup>+</sup><br>(mg/L) | H <sub>2</sub> SiO <sub>3</sub><br>(mg/L) | Total dissolved solids<br>(mg/L) | pH      |
|------------|----------------------------|----------------------------|---------------------------|--------------------------|-------------------------------------------|----------------------------------|---------|
| 01         | -                          | 0.5-10                     | -                         | 3-35                     | -                                         | -                                | -       |
| 02         | ≥4.0                       | ≥0.5                       | ≥0.8                      | ≥0.35                    | ≥1.8                                      | -                                | 6.8-7.8 |
| 02-4       | 4.0-20.0                   | 0.5-10                     | 0.8-20.0                  | 0.35-7.0                 | 1.8-50                                    | 20-100                           | -       |
| 03         | 10-27                      | 5-18                       | 5-18                      | 1-8                      | 30-50                                     | 100-320                          | 7.2-8.5 |
| 04-06      | -                          | -                          | -                         | -                        | -                                         | -                                | -       |
| 07         | 3.5-8.5                    | 1.5-8.0                    | 1.5-5.5                   | 0.8-3.5                  | 25-45                                     | 50-160                           | 7-8     |
| 08         | -                          | -                          | -                         | -                        | -                                         | -                                | -       |
| 09         | 4-10                       | 1.5-5                      | 2-6.8                     | 1-2.5                    | 30-50                                     | 35-100                           | -       |
| 10         | 15-30                      | 2-5                        | 2-10                      | 0.5-2                    | 15-45                                     | 80-200                           | 7.1-8.5 |
| 11         | 2-15                       | 1-8                        | 1-8                       | 0.5-3                    | 30-70                                     | 50-180                           | 7-8     |
| 12         | 4-17                       | 0.1-10                     | 1-15                      | 0.5-10                   | 25-70                                     | 50-180                           | -       |
| 13         | 80                         | 26                         | 6.5                       | 1                        | -                                         | 345                              | 7.2     |
| 14         | -                          | -                          | -                         | -                        | -                                         | -                                | -       |
| 15         | 20-67.2                    | 1.4-6.6                    | 0.4-1.6                   | 0.1-1                    | -                                         | 93-291.6                         | -       |
| 16         | 2-10                       | 2-9                        | 5-15                      | 1-6                      | >50                                       | 80-200                           | -       |
| 17         | 7-20                       | 6-20                       | 3-16                      | 2-8                      | 30-50                                     | 70-300                           | -       |
| 18         | 1-30.8                     | 1.0-7.2                    | 2.6-18.8                  | 1.0-6.8                  | 30-50                                     | 40-160                           | -       |
| 19         | 35-65                      | 3.5-10                     | -                         | 0.2-3                    | 20-80                                     | 80-400                           | 7.2-8.3 |

-: there is no specific information

**Table S2.** The details and physical properties of drinking water samples

| Sample No. | bottle color | material | date          |                 |                 | Volume (L) |
|------------|--------------|----------|---------------|-----------------|-----------------|------------|
|            |              |          | Sampling date | Production Date | expiration date |            |
| 01         | transparent  | PET      | 2021.12.30    | 2021.05.09      | 2022.05.09      | 0.550      |
| 02-1       | transparent  | PET      | 2021.12.30    | 2019.09.29      | 2021.09.29      | 0.550      |
| 02-2       | transparent  | PET      | 2021.12.30    | 2021.08.19      | 2023.08.19      | 0.550      |
| 02-3       | transparent  | PET      | 2021.12.30    | 2021.04.15      | 2023.04.15      | 0.380      |
| 02-4       | transparent  | PET      | 2021.12.31    | 2021.11.05      | 2023.05.05      | 1.000      |
| 03         | transparent  | PET      | 2021.12.30    | 2021.04.29      | 2022.10.29      | 0.330      |
| 04-1       | transparent  | PET      | 2021.12.30    | 2021.09.13      | 2023.03.13      | 0.550      |
| 04-2       | transparent  | PET      | 2021.12.30    | 2021.09.25      | 2023.03.25      | 0.550      |
| 05         | light blue   | PET      | 2021.12.30    | 2021.11.30      | 2022.11.30      | 0.550      |
| 06         | light blue   | PET      | 2021.12.30    | 2021.10.22      | 2022.10.22      | 0.560      |
| 07         | transparent  | PET      | 2021.12.30    | 2021.08.01      | 2022.02.01      | 0.520      |
| 08-1       | transparent  | PET      | 2021.12.30    | 2021.09.24      | 2022.09.24      | 0.555      |
| 08-2       | transparent  | PET      | 2021.12.30    | 2021.03.30      | 2021.03.30      | 0.555      |
| 09         | transparent  | PET      | 2021.12.30    | 2021.05.25      | 2023.05.25      | 0.535      |
| 10         | transparent  | PET      | 2021.12.30    | 2020.08.04      | 2022.08.04      | 0.350      |
| 11         | transparent  | PET      | 2021.12.30    | 2021.04.08      | 2022.10.08      | 0.430      |
| 12         | light blue   | PET      | 2021.12.30    | 2021.07.10      | 2022.07.10      | 0.348      |
| 13         | light blue   | PET      | 2021.12.30    | 2021.01.05      | 2023.01.05      | 0.330      |
| 14         | light blue   | PET      | 2021.12.30    | 2021.03.06      | 2022.03.06      | 0.550      |
| 15         | transparent  | PET      | 2021.12.30    | 2021.03.21      | 2023.03.21      | 0.330      |
| 16         | transparent  | PET      | 2021.12.30    | 2021.04.15      | 2022.10.15      | 0.570      |
| 17         | transparent  | PET      | 2021.12.30    | 2021.07.02      | 2023.01.02      | 0.550      |
| 18         | transparent  | PET      | 2021.12.31    | 2021.04.22      | 2023.04.22      | 0.333      |
| 19         | transparent  | PET      | 2021.01.04    | 2021.11.12      | 2023.11.12      | 0.350      |
| 20         | light blue   | -        | 2021.12.30    | 2021.11.29      | 2022.03.01      | -          |
| 21         | dark blue    | -        | 2021.12.30    | -               | -               | -          |
| 22         | dark blue    | -        | 2021.12.30    | -               | -               | -          |
| 23-28      | -            | -        | 2021.01.04    | -               | -               | -          |

-: there is no specific information
